# Supplementary material
Source: PubMed Central journal article supplement (PMC4178694)

**Supplementary table 1.** Rate constants ( $k$  ( $s^{-1}$ )) and amplitudes ( $B$  (pH/mM)) of acid influx (i) and recovery (r) for sorbic and acetic acid with standard deviations based on at least three replicates.

| K-sorbate |                 |                 |                 |                 |
|-----------|-----------------|-----------------|-----------------|-----------------|
|           | $k_i$           | $B_i$           | $k_r$           | $B_r$           |
| Starved   | 1.29 $\pm$ 0.09 | 0.87 $\pm$ 0.07 |                 |                 |
| Glucose   | 1.87 $\pm$ 0.34 | 0.78 $\pm$ 0.33 | 0.08 $\pm$ 0.04 | 0.30 $\pm$ 0.06 |

| K-acetate |                 |                 |                 |                 |
|-----------|-----------------|-----------------|-----------------|-----------------|
|           | $k_i$           | $B_i$           | $k_r$           | $B_r$           |
| Starved   | 1.27 $\pm$ 0.33 | 0.66 $\pm$ 0.11 |                 |                 |
| Glucose   | 2.2 $\pm$ 0.19  | 0.59 $\pm$ 0.16 | 0.05 $\pm$ 0.01 | 0.39 $\pm$ 0.06 |

**Supplementary table 2.** The effect of weak organic acids on  $\Delta\text{pH}$  ,  $\Delta\Psi$  and proton motive force.

|             | $Z^*\Delta\text{pH}$ (mV) | $\Delta\Psi$ (mV) | PMF (mV)        |
|-------------|---------------------------|-------------------|-----------------|
| M3G, pH=6.4 | 84.4 $\pm$ 3.2            | 103.9 $\pm$ 9.1   | 188.3 $\pm$ 9.6 |
| 3 mM K-S    | 66.5 $\pm$ 0.3            | 37.8 $\pm$ 2.7    | 104.3 $\pm$ 2.7 |
| 11 mM K-S   | 58.9 $\pm$ 0.6            | 24.8 $\pm$ 5.4    | 83.7 $\pm$ 5.4  |
| 25 mM K-Ac  | 61.1 $\pm$ 0.4            | 87.2 $\pm$ 4.4    | 148.3 $\pm$ 4.4 |
| 80 mM K-Ac  | 50.6 $\pm$ 0.5            | 58.2 $\pm$ 6.5    | 108.8 $\pm$ 6.5 |

**Supplementary table 3.** The effects of weak organic acid stress on glucose metabolism and respiration. All fluxes are in  $\text{mmol h}^{-1} (\text{mg protein})^{-1}$ . The carbon balance was calculated with the assumptions stated in the materials and methods.

|             | qGlucose | qAcetate | qButanediol | qO <sub>2</sub> | C-balance (%) |
|-------------|----------|----------|-------------|-----------------|---------------|
| M3G, pH=6.4 | 7.80     | 5.27     | 0.73        | 27.87           | 90.7          |
| 3 mM K-S    | 3.56     | 2.43     | 0.00        | 14.13           | 88.9          |
| 11 mM K-S   | 2.58     | 1.97     | 0.00        | 5.52            | 61.2          |
| 25 mM K-Ac  | 2.08     | 0.54     | 0.95        | 22.66           | 231.9         |
| 80 mM K-Ac  | 1.45     | 0.09     | 0.70        | 3.92            | 91.5          |

### Supplementary figure 1.

Actual data (open figures) and modelled acidification (closed symbols) and recovery upon weak organic acid injection in *B. subtilis* PB2 P<sub>ptsG</sub>-IpHluorin. Sorbic acid is injected at t = 1s. Medium pH = 6.4

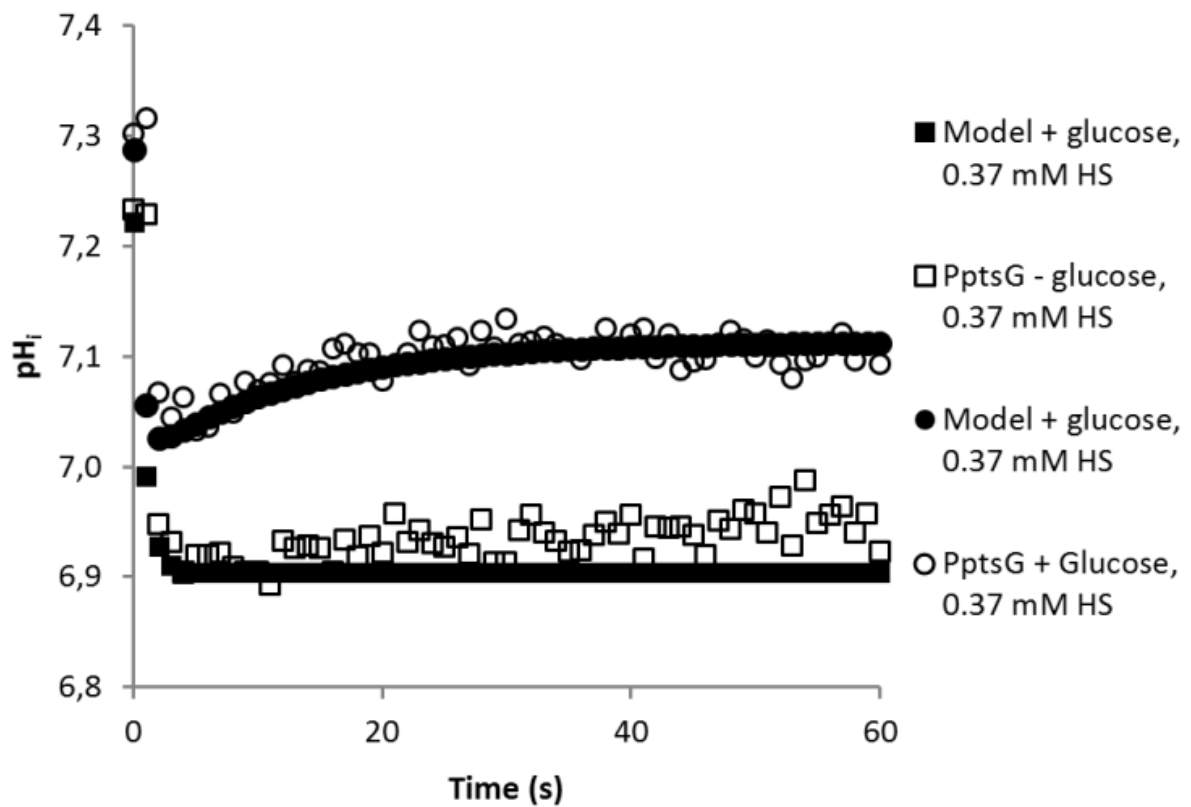

Supplement: AEM.01391-14_zam999105666so1.pdf [file AEM.01391-14_zam999105666so1.pdf]
